# Supplementary material
Source: PubMed Central journal article supplement (PMC1088365)

A)

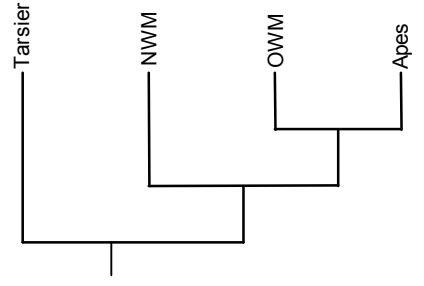

B)

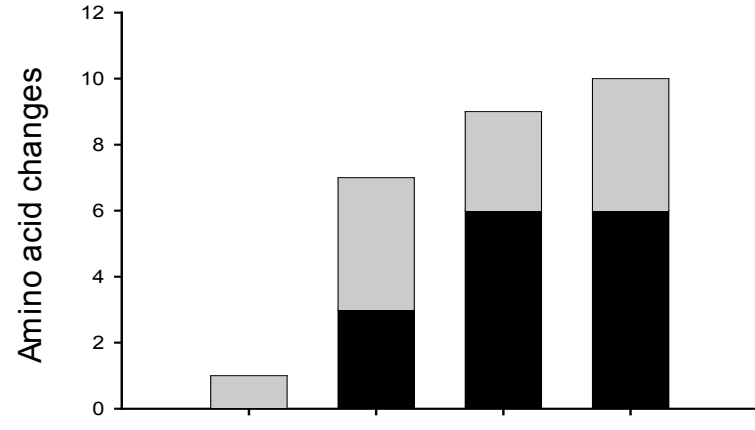

C)

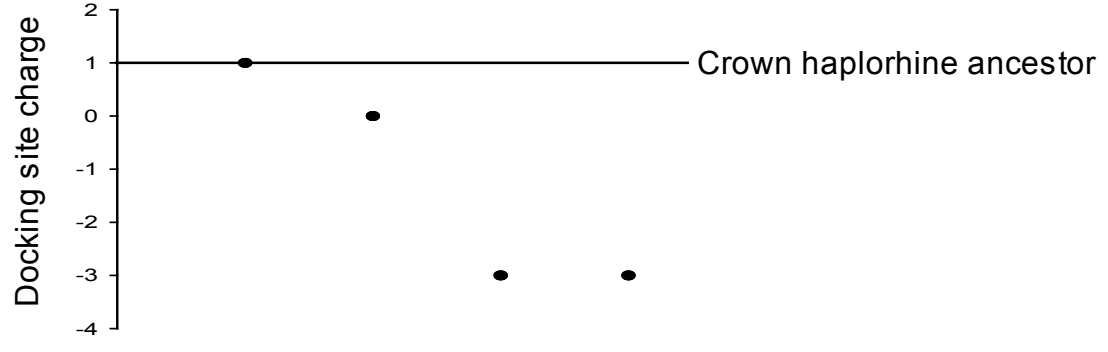

Supplement: pnas_102_18_6379__2.pdf [file pnas_102_18_6379__2.pdf]
